# Supplementary material for: The loss of succinate dehydrogenase B expression is frequently identified in hemangioblastoma of the central nervous system
Source: PubMed Central journal article supplement (PMC6458311; doi:10.1038/s41598-019-42338-z), 2019-04-10
Supplement: 41598_2019_42338_MOESM1_ESM.pdf [file 41598_2019_42338_MOESM1_ESM.pdf]

## ***Supplementary Information***

### **The loss of succinate dehydrogenase B expression is frequently identified in hemangioblastoma of the central nervous system**

Tae Hoon Roh<sup>1,+</sup>, Hyunee Yim<sup>2,+</sup>, Jin Roh<sup>2</sup>, Kyi Beom Lee<sup>2</sup>, So Hyun Park<sup>2</sup>, Seon-Yong Jeong<sup>3</sup>,  
Se-Hyuk Kim<sup>1,\*</sup>, Jang-Hee Kim<sup>2,\*</sup>.

<sup>1</sup> Department of Neurosurgery, Ajou University School of Medicine, Suwon, 16499, Korea

<sup>2</sup> Department of Pathology, Ajou University School of Medicine, Suwon, 16499, Korea

<sup>3</sup> Department of Medical Genetics, Ajou University School of Medicine, Suwon, 16499, Korea

#### **Contents**

Supplemental Figure S1. SDHB and SDHA immunohistochemistry in hemangioblastoma.

Supplemental Figure S2. HIF-1 $\alpha$  expression in hemangioblastoma with a weak-diffuse pattern of SDHB immunostaining.

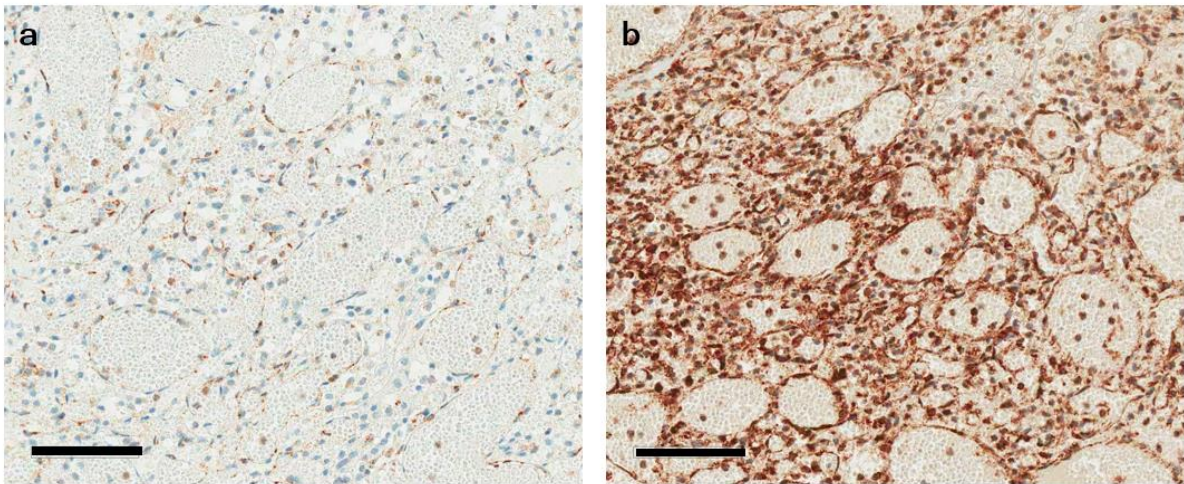

**Supplementary Figure S1. SDHB and SDHA immunohistochemistry in hemangioblastoma.** (a) Negative SDHB immunostaining in the stromal tumor cells and (b) Positive SDHA immunostaining at the corresponding area of hemangioblastoma. Bar indicates 100  $\mu\text{m}$ .

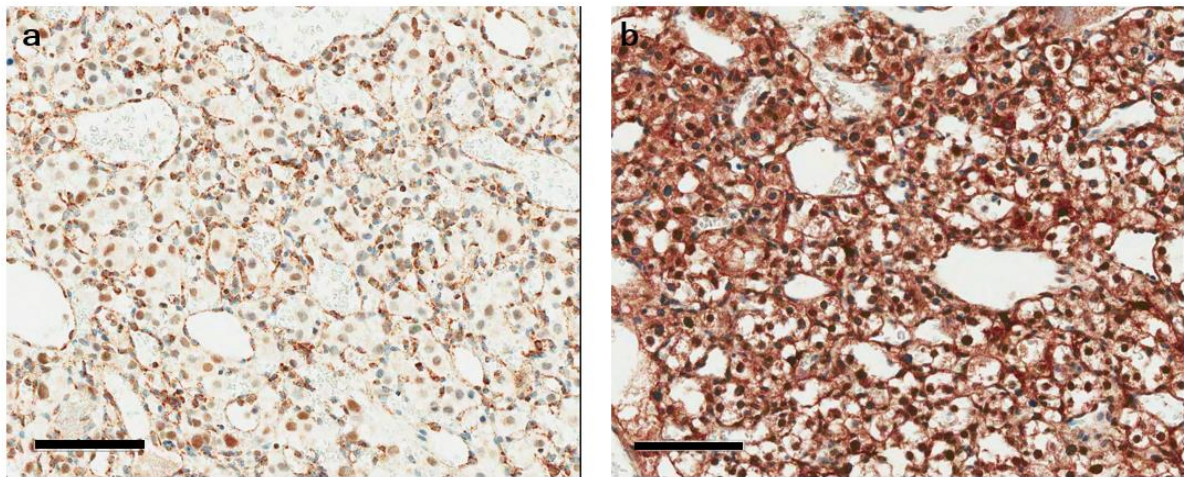

**Supplementary Figure S2. HIF-1 $\alpha$  expression in hemangioblastoma with a weak-diffuse pattern of SDHB immunostaining.** (a) a weak-diffuse pattern of SDHB immunostaining (b) HIF-1 $\alpha$  immunostaining in the corresponding areas. Increased expressions of HIF-1 $\alpha$  are noted at the nuclei and cytoplasm of the stromal tumor cells in hemangioblastoma. Bar indicates 100  $\mu\text{m}$ .
